# Supplementary material for: Thyroid liposarcoma: a case report
Source: publisher site journal article supplement (doi:10.1515/iss-2021-0037), 2022-10-14
Supplement: Supplementary file [file j_iss-2021-0037_suppl.pdf]

## Reviewer Assessment

# M. Gerard et al.: Thyroid liposarcoma: a case report

## Reviewers' Comments to Original Submission

**Reviewer 1: Stefanou, Christos**

Date received: 07-Jun-2022

Reviewer recommendation: **Accept in present form**

Reviewer overall scoring: **Excellent**

Assessment Form scores: 5 = High/Yes; 3 = Medium/Adequate; 1 = Low

|                                                                   |     |   |   |  |  |
|-------------------------------------------------------------------|-----|---|---|--|--|
| Is the subject area appropriate for the journal                   | 5   |   |   |  |  |
| Does the title clearly reflect the paper's content?               | 5   |   |   |  |  |
| Does the abstract clearly reflect the paper's content             | 5   |   |   |  |  |
| Do the keywords clearly reflect the paper's content?              |     | 4 |   |  |  |
| Does the introduction present the problem clearly?                | 5   |   |   |  |  |
| Are the results/ conclusions justified?                           | 5   |   |   |  |  |
| How comprehensive and up-to-date is the subject matter presented? | 5   |   |   |  |  |
| How adequate is the data presentation?                            | 5   |   |   |  |  |
| Are units and terminology used correctly?                         | 5   |   |   |  |  |
| Is the number of cases adequate?                                  |     |   | 3 |  |  |
| Are the experimental methods/ clinical studies adequate?          | 5   |   |   |  |  |
| Is the length appropriate in relation to the content?             | 5   |   |   |  |  |
| Does the reader get new insights from the article?                | 5   |   |   |  |  |
| Please rate the practical significance.                           | 5   |   |   |  |  |
| Please rate the accuracy of methods.                              |     | 4 |   |  |  |
| Please rate the statistical evaluation and quality control.       |     | 4 |   |  |  |
| Please rate the appropriateness of the figures and tables.        | 5   |   |   |  |  |
| Please rate the appropriateness of the references.                | 5   |   |   |  |  |
| Please evaluate the writing style and use of language.            | 5   |   |   |  |  |
| Please judge the overall scientific quality of the manuscript.    | 5   |   |   |  |  |
| Are the methods used worthy of reproduction in greater deal?      | Yes |   |   |  |  |
| Would you be willing to review a revision of this manuscript?     | No  |   |   |  |  |

**Comments to author:** A very rare case report. Very well described.  
Well done with the work up and the treatment.

**Reviewer 2: anonymous**

Date received: 29-Apr-2022

Reviewer recommendation: **Return to author for minor modifications**Reviewer overall scoring: **Medium**

Assessment Form scores: 5 = High/Yes; 3 = Medium/Adequate; 1 = Low

|                                                                   |     |   |   |  |   |
|-------------------------------------------------------------------|-----|---|---|--|---|
| Is the subject area appropriate for the journal                   |     | 4 |   |  |   |
| Does the title clearly reflect the paper's content?               | 5   |   |   |  |   |
| Does the abstract clearly reflect the paper's content             | 5   |   |   |  |   |
| Do the keywords clearly reflect the paper's content?              | 5   |   |   |  |   |
| Does the introduction present the problem clearly?                | 5   |   |   |  |   |
| Are the results/ conclusions justified?                           |     | 4 |   |  |   |
| How comprehensive and up-to-date is the subject matter presented? |     |   | 3 |  |   |
| How adequate is the data presentation?                            |     |   | 3 |  |   |
| Are units and terminology used correctly?                         |     |   | 3 |  |   |
| Is the number of cases adequate?                                  |     |   |   |  | 1 |
| Are the experimental methods/ clinical studies adequate?          |     | 4 |   |  |   |
| Is the length appropriate in relation to the content?             |     | 4 |   |  |   |
| Does the reader get new insights from the article?                |     |   | 3 |  |   |
| Please rate the practical significance.                           |     |   | 3 |  |   |
| Please rate the accuracy of methods.                              |     | 4 |   |  |   |
| Please rate the statistical evaluation and quality control.       |     |   |   |  | 1 |
| Please rate the appropriateness of the figures and tables.        |     |   | 3 |  |   |
| Please rate the appropriateness of the references.                |     | 4 |   |  |   |
| Please evaluate the writing style and use of language.            |     | 4 |   |  |   |
| Please judge the overall scientific quality of the manuscript.    |     | 4 |   |  |   |
| Are the methods used worthy of reproduction in greater deal?      |     |   |   |  |   |
| Would you be willing to review a revision of this manuscript?     | Yes |   |   |  |   |

**Comments to author:** Dear authors,

this is a nicely presented case, which is truly worthwhile to be published.

However, I have one major concern: this refers to the histology. You describe that the sarcoma invades the thyroid, so my question is: is it truly a liposarcoma of the thyroid itself or is it a liposarcoma originating somewhere else and just invading the thyroid? This needs definitely to be clarified and I highly recommend an additional figure which clearly shows the histology that it is truly a thyroid liposarcoma. This should be witnessed by the pathologist who did the examination. He or she should then be a coauthor of the paper.

I am glad to review the paper again, once it is revised.

**Authors' Response to Reviewer Comments**

Date received: 17-Jul-2022

**Response to reviewer 1**

Thank you for your comment and your pertinent remark. The pathological evaluation showed that the lesion was invading the thyroid. The origin of the lesion seems to be the peri-thyroidal adipose tissue (this is stated in the report). I think, as you say, that this may not be a "true" liposarcoma of the thyroid itself. Unfortunately, we do not have any images to show. The pathologist who read the slides is already on the author-list (Dr Myriam DECAUSSIN-PETRUCCI).

**Response to reviewer 2**

Thank you for your comment and your pertinent remarks.

**Comments by the Editor-in-Chief to Revised Submission**

All reviewer comments were addressed adequately and changes made to the manuscript accordingly and the manuscript should be published in its present stage.
